# Supplementary material for: A Field-Portable Cell Analyzer without a Microscope and Reagents
Source: MDPI journal article supplement (doi:10.3390/s18010085), 2017-12-29
Supplement: s1 [file s1]

## Supplementary Materials

Article

# A field-portable cell analyzer without a microscope and reagents

Dongmin Seo <sup>1,†</sup>, Sangwoo Oh <sup>1,2,†</sup>, Moonjin Lee <sup>2</sup>, Yongha Hwang <sup>3,\*</sup>, and Sungkyu Seo <sup>1,\*</sup>

<sup>1</sup> Department of Electronics and Information Engineering, Korea University, Sejong, Republic of Korea

<sup>2</sup> Maritime Safety Research Division, Korea Research Institute of Ships & Ocean Engineering, Daejeon, Republic of Korea

<sup>3</sup> Department of Electro-Mechanical Systems Engineering, Korea University, Sejong, Republic of Korea

<sup>†</sup> These authors equally contributed to this study.

\* Correspondence: (S. Seo) E-mail; sseo@korea.ac.kr, Tel; +82-44-860-1427, (Y. Hwang) E-mail; hwangyongha@korea.ac.kr, Tel; +82-44-860-1442

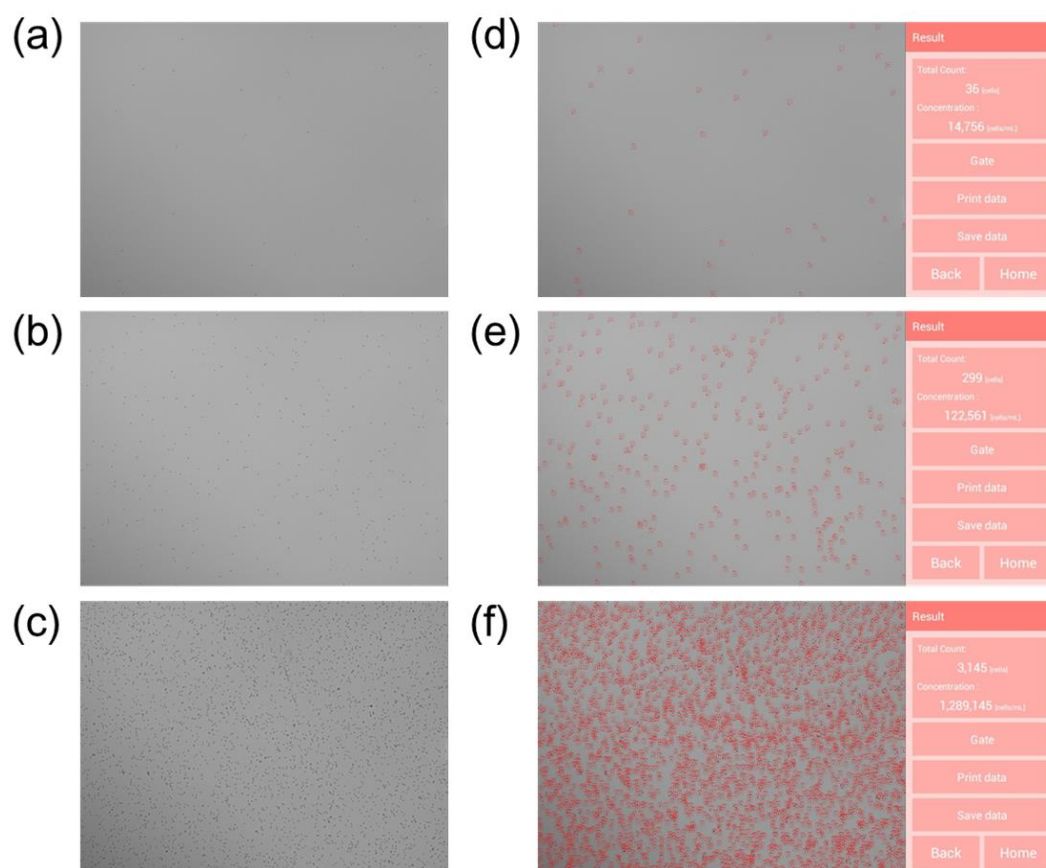

**Figure S1.** Detected images of 10  $\mu\text{m}$  beads by the NaviCell; original image of a concentration of 15,000 cells/mL (a), 120,000 cells/mL (b), and 1,300,000 cells/mL (c) acquired with the CMOS image sensor. (d), (e), and (f) are the results of the analysis from each original image.
